# Supplementary material for: Carbon nanofiber matrix with embedded LaCO3OH synchronously captures phosphate and organic carbon to starve bacteria
Source: Royal Society of Chemistry journal article supplement (doi:10.1039/c6ta04364j), 2016-01-01
Supplement: c6ta04364j1.pdf [file c6ta04364j1.pdf]

## Supporting Information

### **LaCO<sub>3</sub>OH Embedded in Carbon Nanofiber Matrix Synchronously as Catcher of Phosphate and Organic Carbon for Starving Bacteria**

*Xintong Zhang<sup>a</sup>, Wei Wang<sup>a,b\*</sup>, Wenxin Shi<sup>a</sup>, Jiaojie He<sup>a</sup>, Hui Feng<sup>a</sup>, Yongpeng Xu<sup>a</sup>, Fuyi*

*Cui<sup>a,\*</sup>, Ce Wang<sup>b</sup>*

<sup>a</sup>State Key Laboratory of Urban Water Resource and Environment, School of Municipal and  
Environmental Engineering, Harbin Institute of Technology, Harbin 150090, China,  
[wangweirs@hit.edu.cn](mailto:wangweirs@hit.edu.cn), [cuiyuyi@hit.edu.cn](mailto:cuiyuyi@hit.edu.cn)

<sup>b</sup>Alan G Macdiarmid Institute, School of Chemistry, Jilin University, Changchun China

\* Corresponding authors

---

## Experimental section

### Digestion method

(1) Boil 0.01 g of products with 10 mL of aqua regia and 2 mL of HClO<sub>4</sub> at 120 °C until the products were dissolved; (2) After cooling, add 1mL HClO<sub>4</sub> into the solution, evaporate at 160 °C until the residual liquid volume was approximately 1 mL; (3) After cooling, dilute the solution with 2% HNO<sub>3</sub> (MOS grad) to 100 mL.

### HA stock preparation and determination

HA stock solution was prepared by dissolving 1 g of HA solid in 500 mL of 0.1 M NaOH, followed by filtration with 0.45 µm glass fiber filters, and was stored at 4 °C for later use. The HA stock solution was diluted in gradient and the amounts of HA were measured by TOC analyzer (Multi N/C 2100, Analytik-Jena, Germany) and UV-vis spectrophotometer at the same time. The linear regressions between the values of UV254 absorbance at 254 nm and TOC (TOC-UV254) and between the TOC values and the corresponding multiplicative inverse of dilution ratios were done. And the equations of linear regression were obtained (TOC-1/dilution ratios). In the text, the target concentration solution (mg TOC/L) and the practical concentration (mg TOC/L) were acquired by the linear regression equations of TOC-1/dilution ratios and TOC-UV254, respectively. The results were shown in Figure S1.

### Effect of of LaCO<sub>3</sub>OH content on the phosphate and HA capture capacity of LCNFs

1 g/L of LCNFs with different LaCO<sub>3</sub>OH content were put into 50 mg P/L phosphate solution and shaken. Aliquot of 1 mL solution was sampled at specified time intervals and filtered through a 0.45 µm membrane syringe filter. The filtrate for phosphate concentration

---

was analysed by Mo-Sb Anti-spectrophotometer method using UV-vis spectrophotometer (HACH, DR5000, America).

100 mg/L of LCNFs with different  $\text{LaCO}_3\text{OH}$  content were used to remove 3 mg TOC/L of HA, respectively. The initial pH of the solutions was adjusted to  $\sim 7$  with NaOH and HCl. The samples were taken out of the containers at given time intervals. The concentrations of HA were determined by UV-vis spectrophotometer.

## Figures:

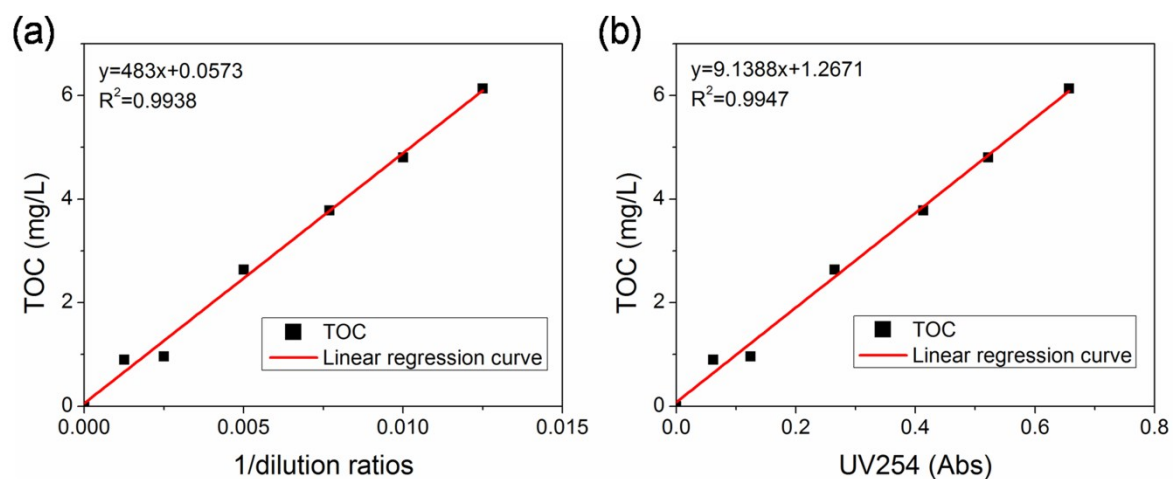

**Figure S1.** (a) Relationship between the TOC values and the corresponding multiplicative inverse of dilution ratios. (b) Relationship between the TOC values and the UV254 absorbance at 254 nm.

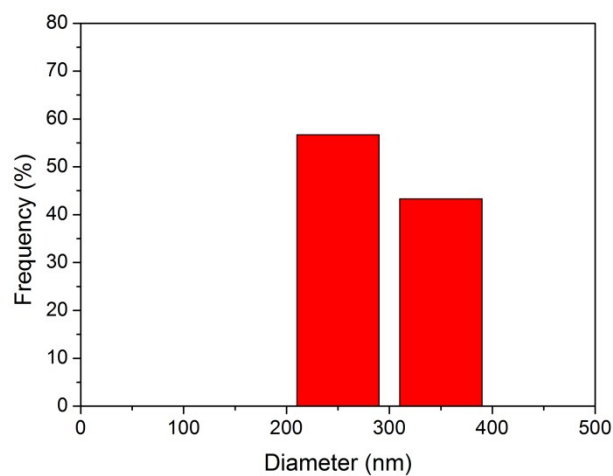

**Figure S2.** The diameter distribution of LCNFs.

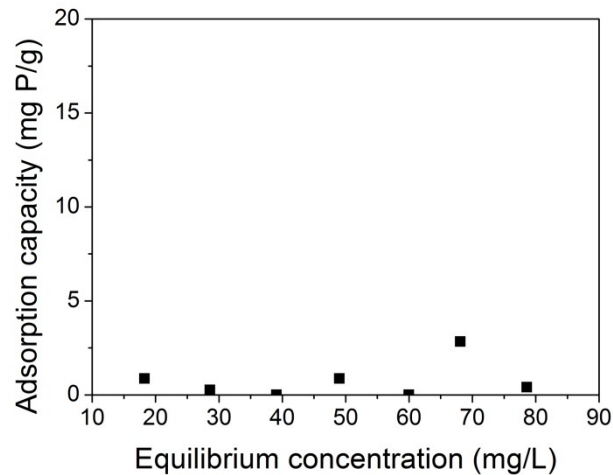

**Figure S3.** The adsorption isotherms of the phosphate on the LCNFs without *in situ* preparation process, the initial P concentrations and the dosage of LCNFs without *in situ* preparation process were 20~80 mg P/L and was 1 g/L, respectively, and the adsorption time was 24 h.

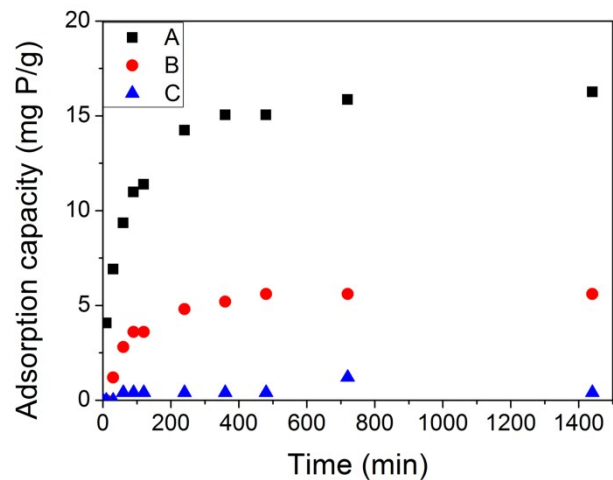

**Figure S4.** Effect of  $\text{LaCO}_3\text{OH}$  content on the phosphate capture capacity of LCNFs, the initial mass ratios of  $\text{La}(\text{NO}_3)_3 \cdot 6\text{H}_2\text{O}$  to PAN were (A) 1:3, (B) 1:6 and (C) 1:10, respectively. The initial phosphate concentration and the dosage of LCNFs were 50 mg P/L and 1 g/L, respectively.

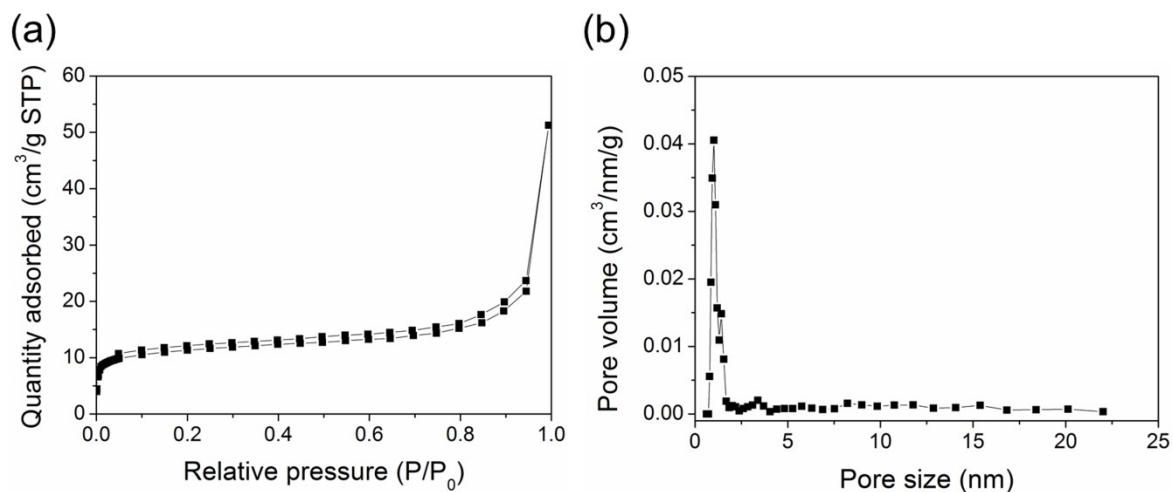

**Figure S5.** (a) N<sub>2</sub> adsorption–desorption isotherm of LCNFs. (b) Pore size distribution of LCNFs.

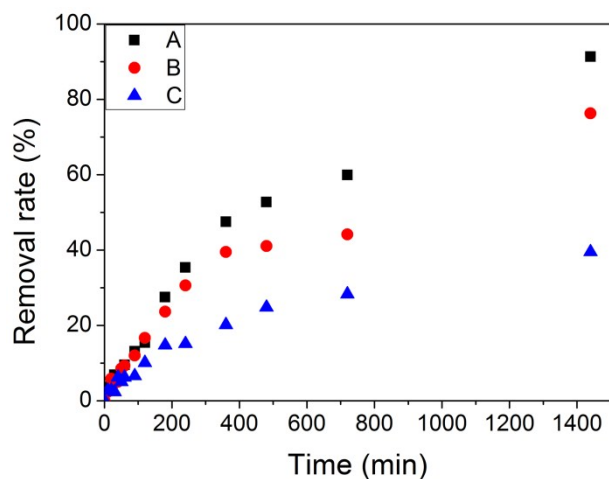

**Figure S6.** Effect of LaCO<sub>3</sub>OH content in LCNFs on the HA removal rate, the initial mass ratios of La(NO<sub>3</sub>)<sub>3</sub>·6H<sub>2</sub>O to PAN were (A) 1:3, (B) 1:6 and (C) 1:10, respectively. The initial HA concentration and the dosage of LCNFs were 3 mg TOC/L and 100 mg/L, respectively.

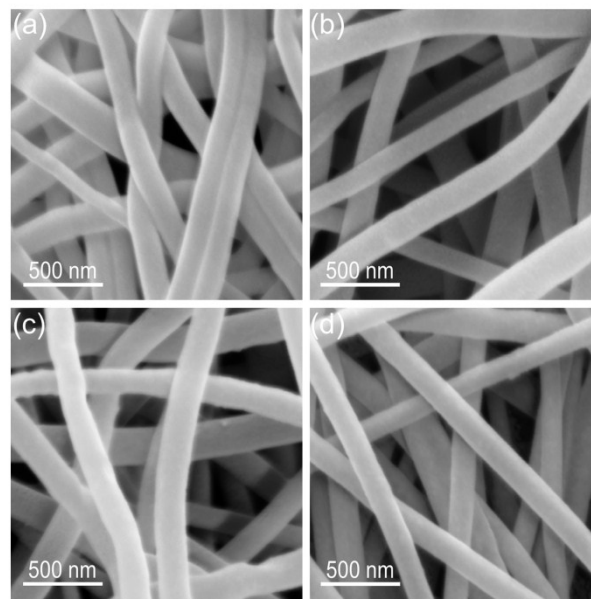

**Figure S7.** (a-d) are SEM images of LCNFs, CNFs, PLNFs and NFs, respectively.

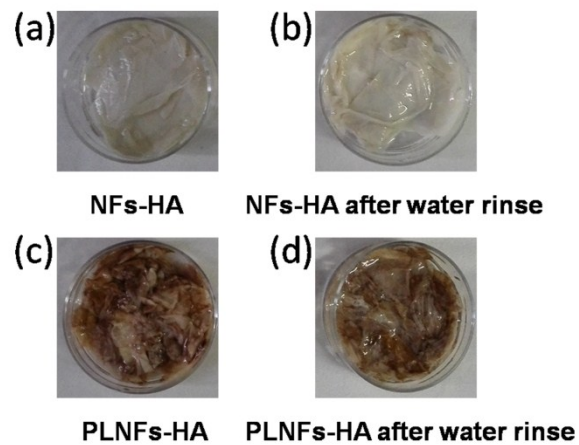

**Figure S8.** (a) and (c) are the digital pictures of NFs and PLNFs after adsorption of 3 mg TOC/L HA and abbreviated to NFs-HA and LNFs-HA, respectively. (a) and (c) are the digital pictures of NFs-HA and PLNFs-HA after adsorption water rinse for three times.

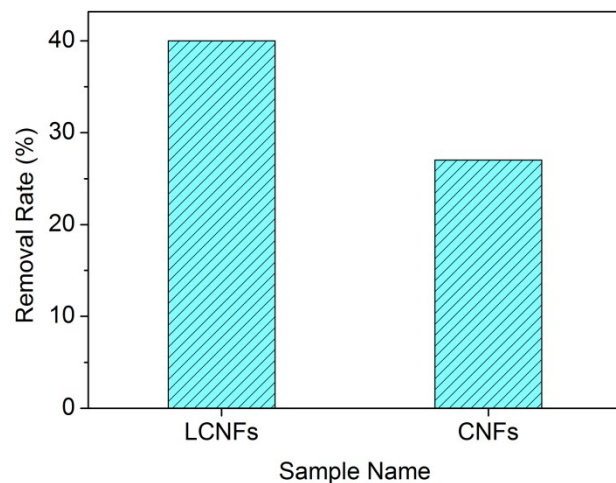

**Figure S9.** The removal rates of organic matters in tap water by LCNFs and CNFs, respectively. The dosages of LCNFs and CNFs were 0.2 g/L, and the tap water volume was 5 L. The experiments were carried out at 25°C.



## Tables:

**Table S1** Kinetic model parameters of phosphate adsorption by LCNFs.

| Pseudo first-order kinetics |                         |       | Pseudo second-order kinetics                  |                         |       |
|-----------------------------|-------------------------|-------|-----------------------------------------------|-------------------------|-------|
| $k_1$ (1/min)               | $q_e$ (cal)<br>(mg P/g) | $R^2$ | $k_2$ (g•mg <sup>-1</sup> min <sup>-1</sup> ) | $q_e$ (cal)<br>(mg P/g) | $R^2$ |
| 0.016                       | 15.22                   | 0.963 | 0.001                                         | 16.62                   | 0.986 |

**Table S2** Equilibrium isotherm model parameters of phosphate adsorption by LCNFs at 25 °C.

| Langmuir       |                 |       | Freundlich |              |       |
|----------------|-----------------|-------|------------|--------------|-------|
| $q_m$ (mg P/g) | $K_L$<br>(L/mg) | $R^2$ | 1/n        | $K_F$ (mg/g) | $R^2$ |
| 18.96          | 64.59           | 0.896 | 0.141      | 12.17        | 0.870 |

**Table S3** Surface and pore parameters of CNFs and LCNFs.

|       | BET specific surface area<br>(m <sup>2</sup> /g) | Total pore volume<br>(cc/g) | Micropore volume<br>(cc/g) | Pore width<br>(nm) |
|-------|--------------------------------------------------|-----------------------------|----------------------------|--------------------|
| CNFs  | 27.1                                             | 0.016                       | 0.011                      | 1.096              |
| LCNFs | 41.8                                             | 0.034                       | 0.013                      | 1.007              |
